# Supplementary material
Source: Research Square preprint supplement (doi:10.21203/rs.3.rs-9102551/v1)
Supplement: Supplementary file 1 [file a53d50e4274a2d23a73fcfd7.docx]

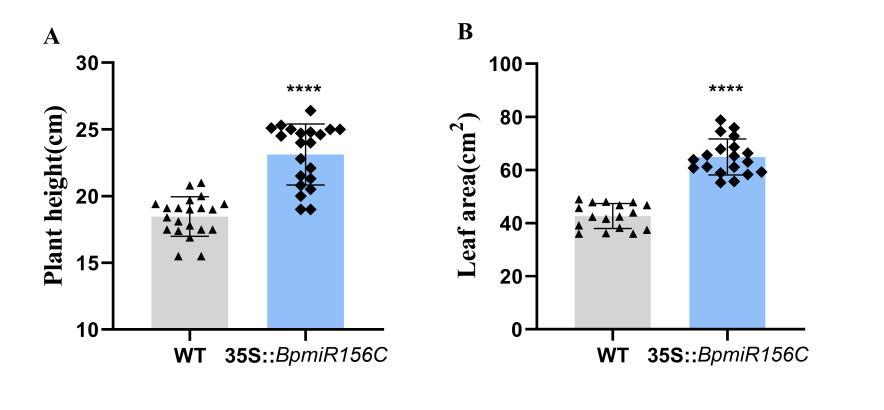


**Figure . S1** *bp-miR156c* regulates the growth of birch.

（A）Plant height, （B）leaf area, Error bars represent the mean ± SD from three independent biological replicates (each replicate consisted of 15 plants). Asterisks indicate significant differences between the WT and transgenic plants as determined by one-way ANOVA with Tukey's multiple comparisons test. (**P* < 0.05, ***P* < 0.01, ****P* < 0.001, *****P* < 0.0001).


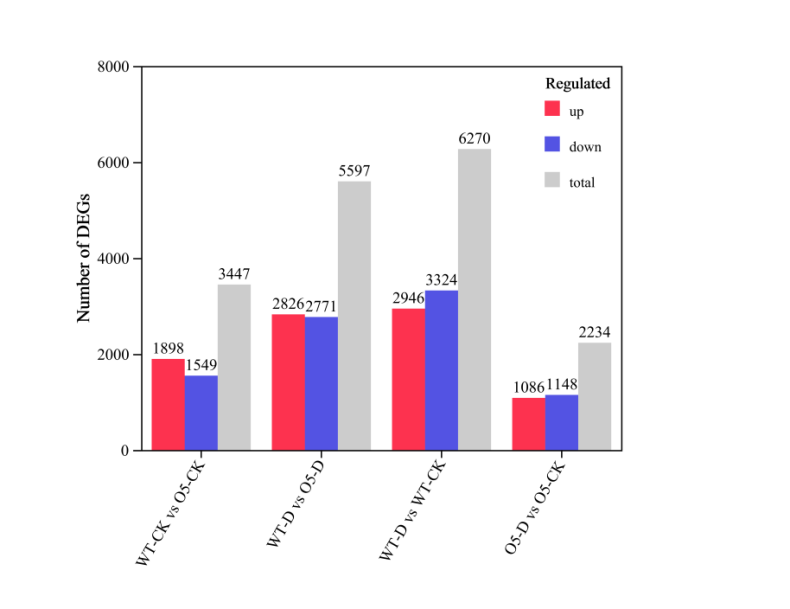


**Figure . S2** The total number of DEGs in the *BpSPL2* transcriptome


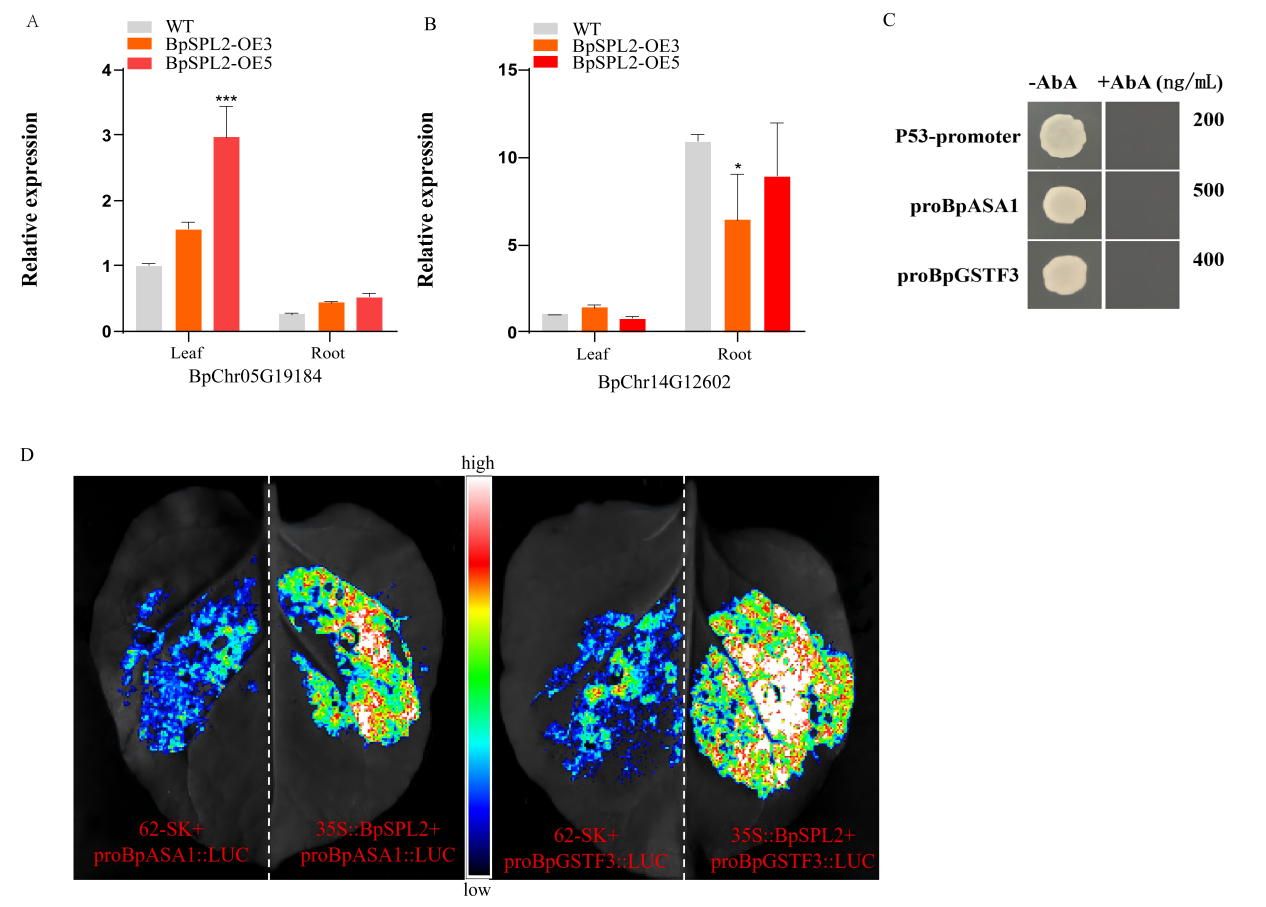


**Figure .S3** (A), (B) Expression patterns of BpChr14G12620 and BpChr05G19184 in *BpSPL2-OE* plants; (C)Screening of the minimum inhibitory concentration of the bait vector AbA in yeast one-hybrid experiments. Error bars represent the mean ±SD from three independent biological replicates. Asterisks indicate significant differences between the WT and transgenic plants as determined by one-way ANOVA with Tukey's multiple comparisons test. (**P* < 0.05, ***P* < 0.01, ****P* < 0.001).

**Table S1:primers used in this research**

**1. For construction of GUS staining vector**

35S::156c-GUS-F:gagaacacgggggactctagaGCAACCATTCTCTCTCTAGCTTTCT

35S::156c-GUS-R:ataagggactgaccacccgggGACAATTTAGTACAGGCACACATAAACT

35S::BpSPL2-GUS-F:gagaacacgggggactctagaATGGAGTCTTGGAGTTGCAGTTC

35S::BpSPL2-GUS-F:ataagggactgaccacccgggCACACCTTGTTGGTTGCACACT

Note:the vectors were constructed using homologous recombination, with lowercase letters indicating the vector homology arms.

**2. For construction of Y1H vector**

pGADT-BpSPL2-F: gccatggaggccagtgaattcATGTTCAGCTTTGAGCTAACAACAA

pGADT-BpSPL2-R:cagctcgagctcgatggatccAAAATCTGGTAATTCTGGTATTTCCC

pAbAi-proASA1-F:cttgaattcgagctcggtaccGCCCATGACCACTCCTGTACA

pAbAi-proASA1-R:agcacatgcctcgaggtcgacCTTTTCAAAGCTCATTCAAAGAATCA

pAbAi-proGSTF3-F:cttgaattcgagctcggtaccGATGGGACTTTCCATTTTTCTTTT

pAbAi-proGSTF3-R:agcacatgcctcgaggtcgacGGGTTTAGGGCCCTAATTATGAT

Note:the vectors were constructed using homologous recombination, with lowercase letters indicating the vector homology arms.

**3. For construction of dual-luciferase vector**

pGreen-BpSPL2-SK-F: caggaattcgatatcaagcttATGGAGTCTTGGAGTTGCAGTTC

pGreen-BpSPL2-SK-R:tcagcgtaccgaattggtaccCACACCTTGTTGGTTGCACACT

pGreen-proASA1-LUC-F: ctatagggcgaattgggtaccTCTGTCTCCCCTCGTATCTTACCA

pGreen-proASA1-LUC-R:cgctctagaactagtggatccCTTTTCAAAGCTCATTCAAAGAATCA

pGreen-proGSTF3-LUC-F:ctatagggcgaattgggtaccGGCGTTTGACGTGTACTAAAAATT

pGreen-proGSTF3-LUC-R:cgctctagaactagtggatccGATTGCGGGTGGTGATAAGTG

Note:the vectors were constructed using homologous recombination, with lowercase letters indicating the vector homology arms.

**4. For ChIP-PCR**

proASA1-P1-F:TTCAAGACAAGGGAAGGGAAAA

proASA1-P1-R:CGCAAAAATAGAAGTAGGGTATTTTT

proASA1-P2-F:CCCTACTTCTATTTTTGCGTTTTTAA

proASA1-P2-R:GAATTTTCTAAATGAATAAAGTTCAATTATAAA

proASA1-P3-F:ATCCGCTAAGATTTTCTGTTAAATTCT

proASA1-P3-R:TTCAATAATTTCAAGTATGAGTATTTTTGTAA

proASA1-P4-F:GCCCATGACCACTCCTGTACA

proASA1-P4-R:TCAAAGAATCAAAACCGCCG

proGSTF3-P1-F:GGGCGTTTGACGTGTACTAAAAA

proGSTF3-P1-R:ACGGACTTCTGTCGAACCATGG

proGSTF3-P2-F:CGTCGTACTAAACACCAAAAAATACA

proGSTF3-P2-R:TCTGGAAAGTCTTGAATAAAATCCTAA

proGSTF3-P3-F:GATGGGACTTTCCATTTTTCTTTT

proGSTF3-P3-R:GGGTTTAGGGCCCTAATTATGAT

**5. For RT-qPCR**

Bp18s-F:CATCTCTGATCGGAATGGAAG

Bp18s-R:AGATCCTTTCTGATATCCACG

dl-GST3-F:GCCATCAAAGTCCACGGAAT

dl-GST3-R:TGTCAACAGGAACAAGCTCAA

dl-ASA1-F:TAGTTGGGATGCTCTGCGTG

dl-ASA1-R:TCTCAAAGCGAGGGCAATGT

dl-19184-F:GAAGCTAAGCTGGCTATGGTT

dl-19184-R:TTGTATGGTCGGCAGGTGGTG

dl-12620-F:GGCCATCCCTTGTTGTCCA

dl-12620-R:TCACGCTCTTTCTCTTCGCC

dl-SPL2-F:CGGTGAGGTTGGTAGTGGCTC

dl-SPL2-R:AAATCTTGACTGTTGGCTTCCATAG

dl-156c-F:GTCTGCCTGGGTGTCACGCAA

dl-156c-R:GCTGACAGAAGAGAGTGAGCACA
